# Supplementary material
Source: Springer Nature journal article supplement (https://www.springermedizin.de/resource/supplementary/12936_2012_2144_MOESM1_ESM.pdf/9542650)

Individual, social and cultural factors

Perceptions of

Burden of  
malaria in  
school  
children

Benefits of  
school  
based  
malaria  
control

School  
based  
malaria  
control  
through  
IST

IST  
delivery  
strategies

Acceptability  
of school  
based  
malaria  
control  
through IST

Structural and system factors

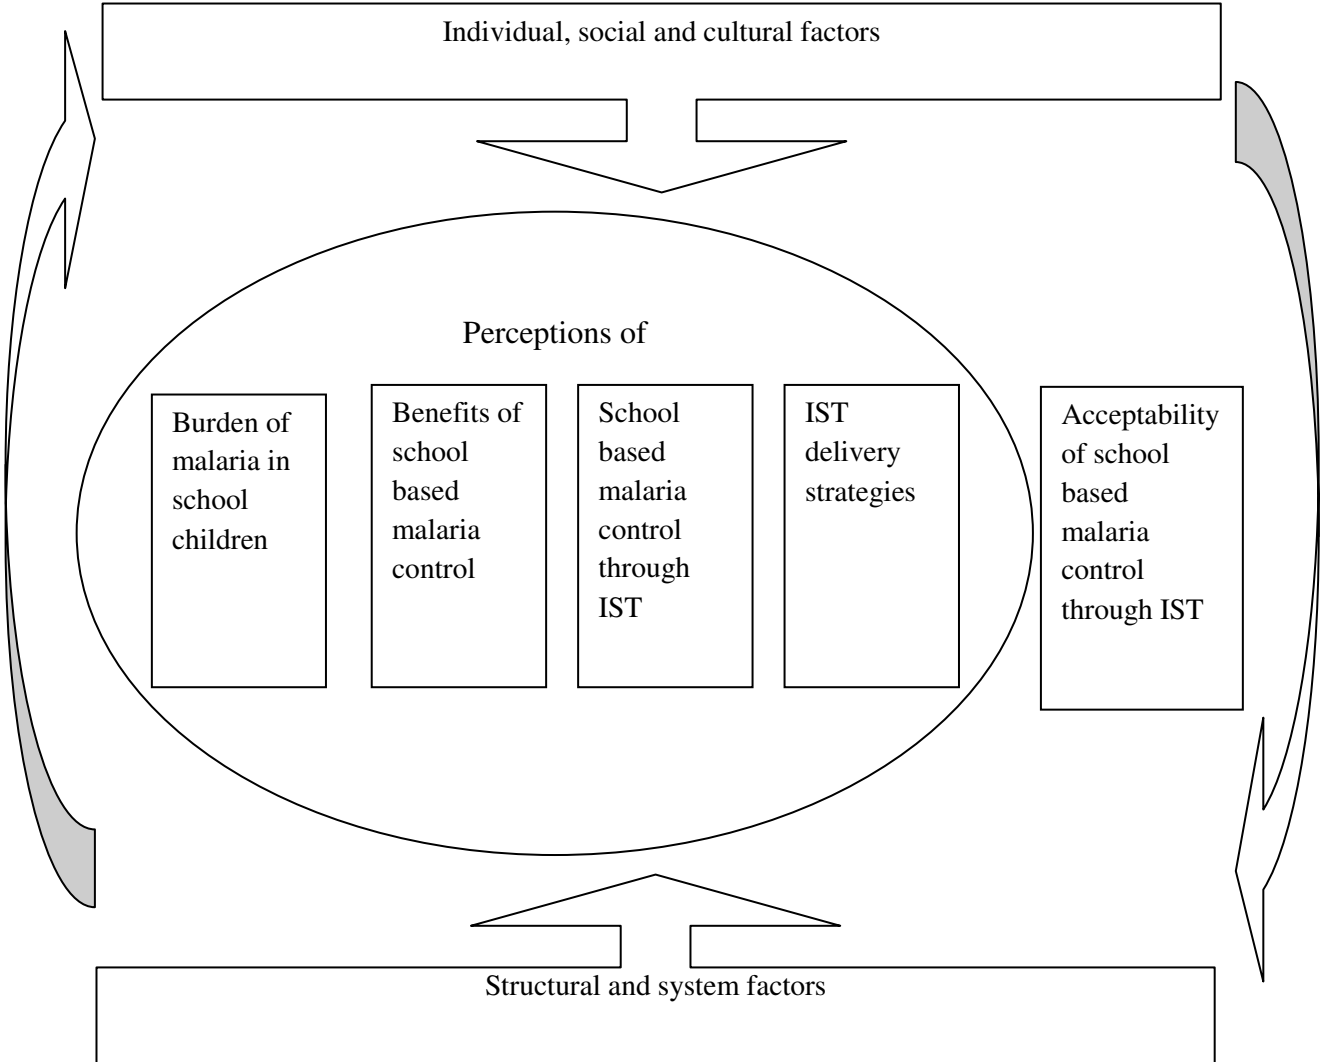

Supplement: MOESM1 [file 9542650]
